# Supplementary material
Source: PubMed Central journal article supplement (PMC4207387)
Supplement: supp_db13-1891_DB131891SupplementaryData.pdf [file supp_db13-1891_DB131891SupplementaryData.pdf]

## SUPPLEMENTARY DATA

The writing group for this manuscript wishes to acknowledge the contributions of the following individuals to the SEARCH for Diabetes in Youth Study:

California: Jean M. Lawrence, ScD, MPH, MSSA, Kristi Reynolds, PhD, MPH, Mary Helen Black, PhD, Harpreet S. Takhar, MPH, Kim Holmquist, BA, and Jin-Wen Hsu, PhD, for the Department of Research & Evaluation and David J. Pettitt, MD, for the Sansum Diabetes Research Institute

Colorado: Dana Dabelea, MD, PhD, Richard F. Hamman, MD, DrPH, Lisa Testaverde, MS, for the Department of Epidemiology, Colorado School of Public Health, University of Colorado Denver, Georgeanna J. Klingensmith, MD, Marian J. Rewers, MD, PhD, David Maahs, MD and Paul Wadwa, MD for the Barbara Davis Center for Childhood Diabetes, Stephen Daniels, MD, PhD, Kristen Nadeau, MD, Department of Pediatrics and Children's Hospital, Clifford A. Bloch, MD, for the Pediatric Endocrine Associates, Carmelita Sorrelman, MSPH, Jeffrey Powell, MD, MPH, Susie John, MD, MPH, for the Navajo Area Indian Health Promotion Program, Kathy Love-Osborne, MD, for the Denver Health and Hospital Authority, and Carol Greenlee, MD for Western Slope Endocrinology

Ohio: Lawrence M. Dolan, MD, Michael Seid, PhD, Elaine Urbina, MD, MS, Amy Shah, MD, Debra A. Standiford, MSN, CNP for the Cincinnati Children's Hospital Medical Center

Carolinas: Elizabeth J. Mayer-Davis, PhD, Joan Thomas MS, RD for the University of North Carolina, Chapel Hill, Anwar Merchant, ScD, Angela D. Liese, PhD, MPH, , Robert R. Moran, PhD, Gladys Gaillard-McBride, RN, CFNP, Malaka Jackson, MD, Lisa Knight, MD for the University of South Carolina, Deborah Bowlby, MD, for the Medical University of South Carolina, James Amrhein, MD, Bryce Nelson, MD for Greenville Health System, Pam Clark, MD for McLeod Pediatric Subspecialists, Mark Parker, MD for Pediatric Endocrinology & Diabetes Specialists, Charlotte, NC

Washington: Catherine Pihoker, MD, Maryam Afkarian, MD, Angela Badaru, MD, Lisa Gilliam, MD, PhD, Irl Hirsch, MD, Lenna L. Liu, MD, MPH, John Neff, MD, and Joyce Yi-Frazier, PhD for the University of Washington, Beth Loots, MPH, MSW, Rebecca O'Connor, RN, Sue Kearns, RN, Mary Klingsheim, RN, Emil Buscaino, BS, Katherine Cochrane, BS, Onel Martinez, MS, and Sharla Semana, BS, for Seattle Children's Hospital, and Carla Greenbaum, MD for Benaroya Research Institute

Centers for Disease Control and Prevention: Giuseppina Imperatore, MD, PhD, Desmond E. Williams, MD, PhD, Henry S. Kahn, MD, Bernice Moore, MBA, Gregg W. Edward, PhD, Sharon H. Saydah, PhD

National Institute of Diabetes and Digestive and Kidney Diseases, NIH: Barbara Linder, MD, PhD

Central Laboratory: Santica M. Marcovina, PhD, ScD, Vinod P. Gaur, PhD, and Jessica Harting for the University of Washington Northwest Lipid Research Laboratories

Coordinating Center: Ronny Bell, PhD, MS, Ralph D'Agostino, Jr., PhD, Jasmin Divers, PhD, Wei Lang, PhD, Timothy Morgan, PhD, Michelle Naughton, PhD, Leora Henkin, MPH, MEd, Gena Hargis, MPH, Maureen T. Goldstein, BA, Jeanette Andrews, MS, Nora Fitzgerald, MS, Scott Isom, MS, Jennifer Talton, MS for Wake Forest School of Medicine
